# Supplementary material for: Accelerated diversification is related to life history and locomotion in a hyperdiverse lineage of microbial eukaryotes (Diatoms, Bacillariophyta)
Source: PubMed Central journal article supplement (PMC6099383; doi:10.1111/nph.15137), 2018-04-06
Supplement: NPH-219-462-s001.pdf [file NPH-219-462-s001.pdf]

## ***New Phytologist* Supporting Information**

**Article title:** Accelerated diversification is related to life history and locomotion in a hyperdiverse lineage of microbial eukaryotes (Diatoms, Bacillariophyta)

**Authors:** Teofil Nakov, Jeremy M. Beaulieu, Andrew J. Alverson

**The following Supporting Information is available for this article:**

**Fig. S1.** Phylogeny of 1,151 diatoms and 20 outgroups reconstructed using an 11-gene dataset.

**Fig. S2.** Diatom diversification estimated from first-last occurrence data for Cenozoic fossils.

**Fig. S3.** Granularity of fossil data and its effect phylogenetic estimates of diversification.

**Fig. S4.** Diatom diversification at predefined ranks with diversity data from AlgaeBase.

**Fig. S5.** Discrete shifts and temporal trends of diversification with diversity data from AlgaeBase.

**Table S1** Sequence data for diatoms and Parmales.

**Table S2** Properties of the phylogenetic dataset, partitioning, and model selection.

**Table S3** Minimum and maximum bounds for calibration of internal nodes.

**Fig. S1** Phylogeny of diatoms reconstructed using an 11-gene dataset for 1,151 diatoms and 20 outgroup heterokont taxa. Shown is the highest-scoring maximum likelihood phylogeny from 100 optimizations. Numbers at internal nodes are bootstrap support as estimated with IQtree's ultrafast bootstrap method (1000 pseudoreplicates).







**Fig. S2** Diatom diversification estimated from first-last occurrence data for Cenozoic fossils from the Barron Diatom Catalog. The data were binned into discrete, non-overlapping intervals with durations of 0.5, 1, 2.5, and 5.0 million years. Shown are medians calculated over the entire time span of the fossil data for each bin size.

### speciation

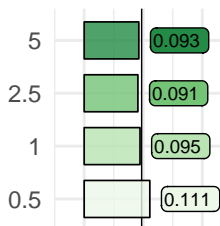

### extinction

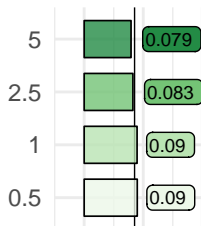

### net diversification

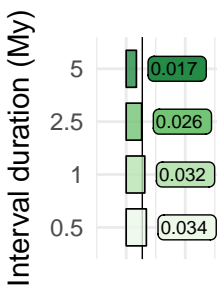

### relative extinction

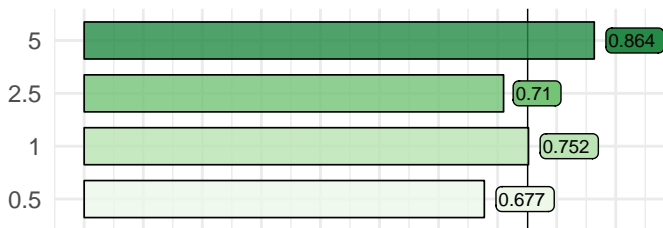

### net turnover

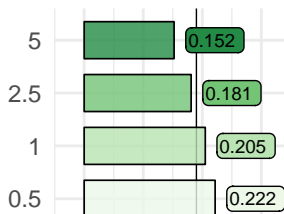

0.0 0.1 0.2 0.3 0.4 0.5 0.6 0.7 0.8 0.9 1.0

Events per 1 My

**Fig. S3** Granularity of fossil data and its effect phylogenetic estimates of diversification. Net diversification rate for diatom clades estimated using fossil relative extinction, crown or stem age, and standing diversity. Fossil relative extinction was estimated from first-last occurrence data were binned into 0.5, 1.0, 2.5, and 5.0 million year intervals. Extant species number data were from DiatomBase.

Clade (sorted by net diversification)

BinSize ○ 0.5 ● 1.0 ● 2.5 ● 5.0

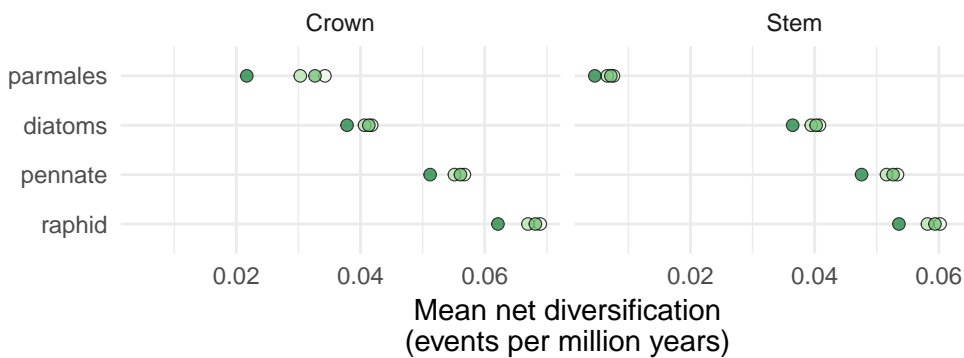

Clade (sorted by net diversification)

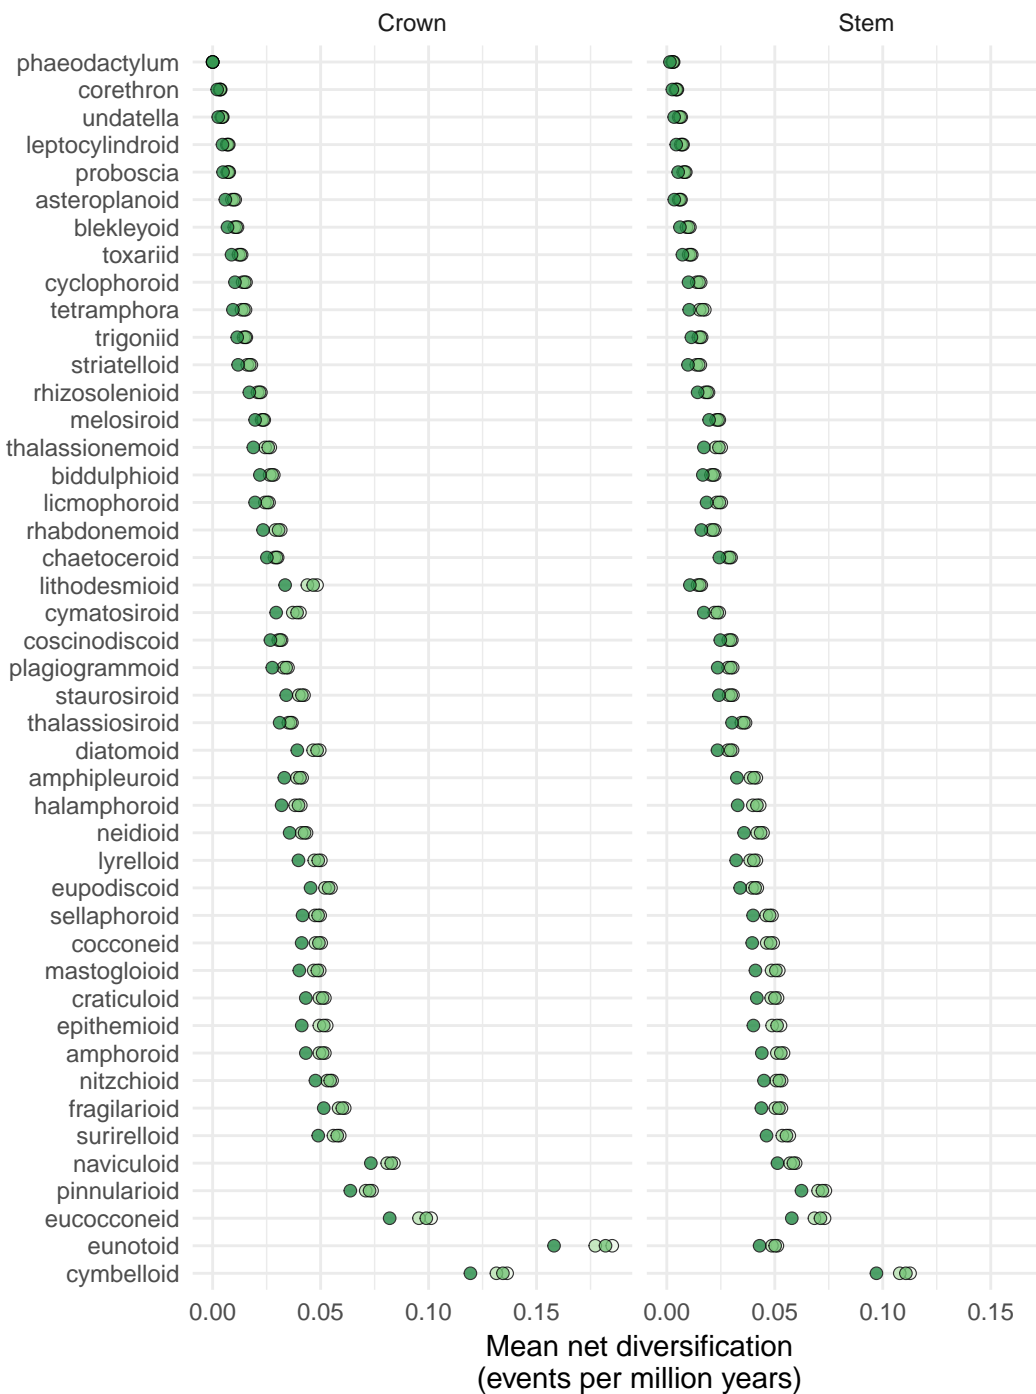

**Fig. S4** Diatom diversification at predefined ranks with diversity data from AlgaeBase.

Diatom diversification based on fossil and phylogenetic data at predefined clades. **a.** Rates of speciation (birth,  $b$ ), extinction (death,  $d$ ) and species turnover ( $\tau = b+d$ ) based on first–last occurrence data for Cenozoic diatoms from the Barron Diatom Catalog. **b.** Confidence intervals (95%) for species richness of pre-defined diatom clades, based on crown ages, standing diversity, and a relative extinction ( $\epsilon=d/b$ ) of  $\epsilon=0.751$ . Line types correspond to different approximations of total diatom diversity (see Methods). Species richness from AlgaeBase is plotted against crown age (million years ago, Mya) and color-coded by the combination of reproductive mode and locomotion. Error bars span the minimum and maximum crown ages of clades across bootstrap trees in million years (My). The clades of all diatoms (D), pennate diatoms (P), and raphid diatoms (R) are shown as open squares. Clades younger than 10 My or having fewer than five species are omitted. **c.** Net diversification rates ( $r = b-d$ ), averaged over bootstrap phylogenies and pooled based on the most-inclusive monophyletic groups with a certain combination of reproductive and locomotory traits. Lines, boxes, and whiskers represent medians, inter-quartile range, and quartile values + 1.5 \* quartile values, respectively. See labels in Fig. 1 for contents of oogamous nonmotile (ON), anisogamous nonmotile (AN), and anisogamous motile (AM) groups. Abbreviations: Oog = oogamous, Anisog = anisogamous, Nonmot = non-motile, Mot = Motile.



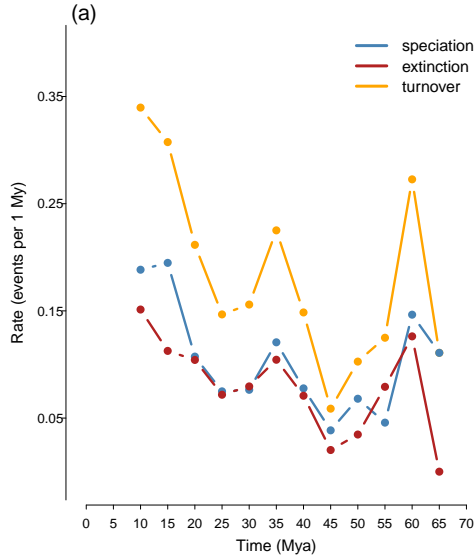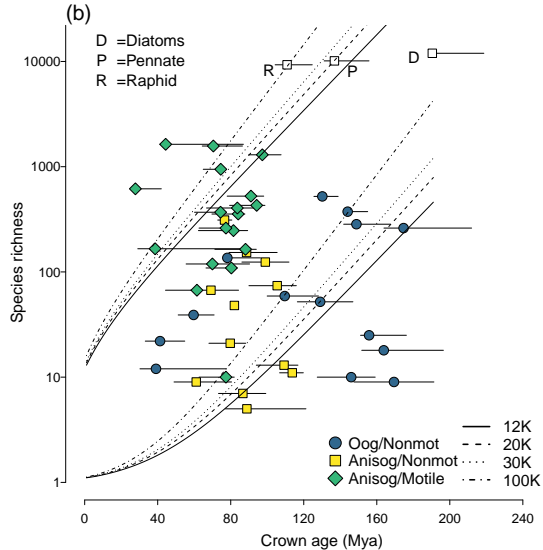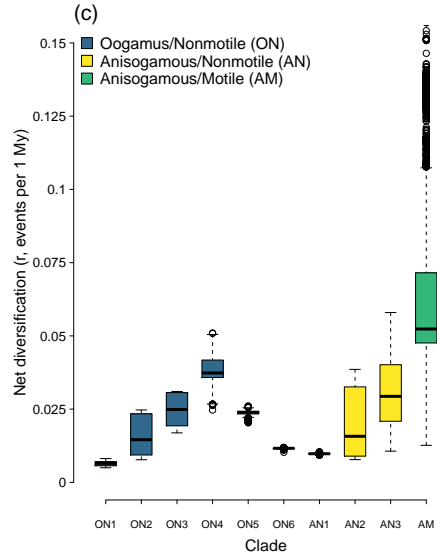

**Fig. S5** Discrete shifts and temporal trends of diversification across diatoms with species richness data from AlgaeBase. **a.** MEDUSA reconstruction of rates of (birth – death,  $r = b-d$ , events per million years) across the genus-level phylogeny of diatoms+Parmales. Triangle size is proportional to the number of species per genus (from AlgaeBase), and the shading corresponds to the estimated net diversification rate. Rate shifts detected in  $\geq 50\%$  of trees are shown. **b-d.** Temporal trends in net diversification, relative extinction ( $\epsilon = d/b$ ), and turnover ( $\tau = b+d$ ) as estimated by the genus-level MEDUSA analysis. Trend lines were calculated by slicing the bootstrap phylogenies into 1 million years (My) intervals and averaging the branch-associated parameters for each slice across trees. Trendlines are shown for the most inclusive clades with a combination of reproductive and locomotory traits and match the groups in Fig. 2c and clade labels in Fig. 1. Rates estimated from the Cenozoic marine fossil record (bin size 5 My) were smoothed using non-parametric local polynomial regression (LOESS) but are otherwise not different from Fig. 2a. The timing of the evolution of active motility (the range of crown age estimates for of raphid pennates across bootstrap phylogenies) is shown as a blue rectangle.

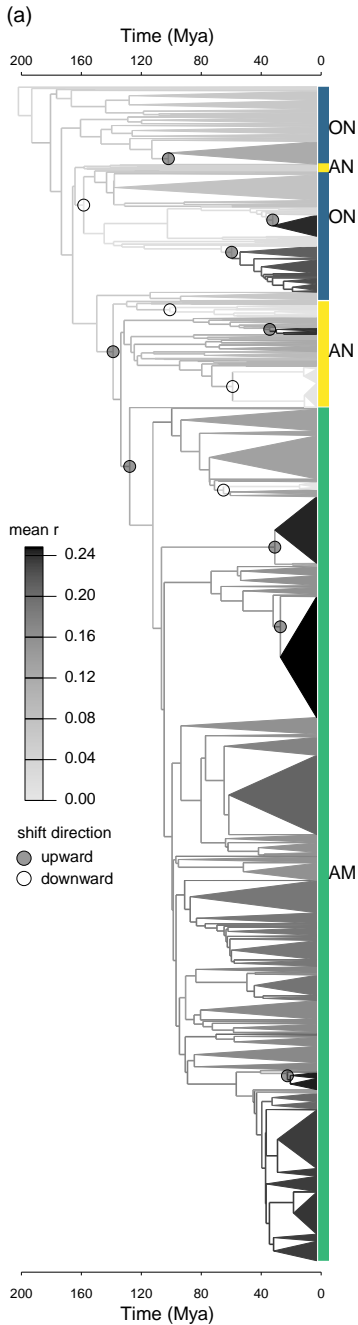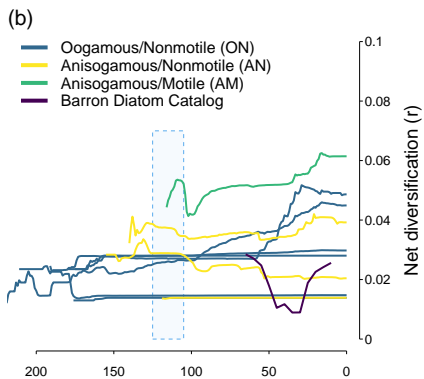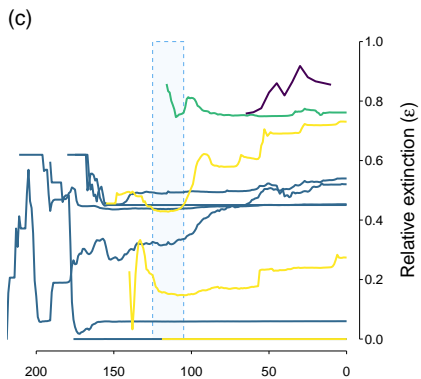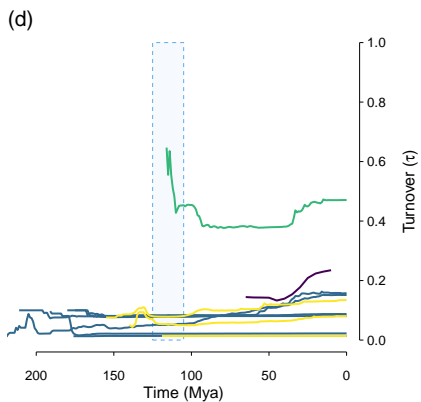



**Table S1** Sequence data for diatoms and Parmales as downloaded from the European Nucleotide Archive on May 20, 2016 and after quality control and redundancy removal.

| Compartment: gene           | Total sequences<br>downloaded:<br>diatoms+Parmales | Total sequences in<br>final dataset | Total length of final<br>alignment |
|-----------------------------|----------------------------------------------------|-------------------------------------|------------------------------------|
| chloroplast: <i>atpB</i>    | 207                                                | 183                                 | 1293                               |
| chloroplast: <i>psaA</i>    | 306                                                | 205                                 | 1584                               |
| chloroplast: <i>psaB</i>    | 266                                                | 230                                 | 1947                               |
| chloroplast: <i>psbA</i>    | 427                                                | 322                                 | 954                                |
| chloroplast: <i>psbC</i>    | 631                                                | 463                                 | 1239                               |
| chloroplast: <i>rbcL</i>    | 2761                                               | 850                                 | 1470                               |
| chloroplast: SSU rRNA (16s) | 341                                                | 51                                  | 1413                               |
| mitochondrion: <i>cob</i>   | 147                                                | 82                                  | 711                                |
| mitochondrion: <i>cox1</i>  | 231                                                | 38                                  | 681                                |
| nucleus: LSU rRNA (28s)     | 863                                                | 163                                 | 371                                |
| nucleus: SSU rRNA (18s)     | 3294                                               | 995                                 | 1594                               |

**Table S2** Properties of the phylogenetic dataset, partitioning, and selection of models of nucleotide substitution. The best models were those with lowest Bayesian Information Criterion (BIC) scores as calculated by the model selection routine available in IQ-TREE.

| Partition                           | #Seqs | #Sites | #Site patterns | Constant Sites | Best model |
|-------------------------------------|-------|--------|----------------|----------------|------------|
| nuclear+plastid rRNA                | 1020  | 3378   | 2225           | 49%            | TIM2+R9    |
| plastid 1 <sup>st</sup> codon       | 869   | 2829   | 1867           | 55%            | GTR+R9     |
| plastid 2 <sup>nd</sup> codon       | 869   | 2829   | 1449           | 73%            | TVM+R6     |
| plastid 3 <sup>rd</sup> codon       | 869   | 2829   | 2791           | 4%             | GTR+R10    |
| mitochondrial 1 <sup>st</sup> codon | 120   | 464    | 286            | 52%            | GTR+I+G4   |
| mitochondrial 2 <sup>nd</sup> codon | 120   | 464    | 188            | 76%            | TVM+R4     |
| mitochondrial 3 <sup>rd</sup> codon | 120   | 464    | 446            | 7%             | TIM+R4     |

**Table S3** Minimum and maximum bounds for calibration of internal nodes. The penultimate distance (PenD) is the time between the first (FA) and next appearance (NA) of a lineage in the fossil record (Norris *et al.*, 2015). The ghost lineage time (GLin) is the difference between the first appearances of two sister lineages (Norris *et al.*, 2015). The minimum and maximum bounds for the ages of calibrated nodes were taken as the 5% and 95% quantiles of a prior distribution derived from the observed PenD or GLin times (Methods). When information for calculating PenD or GLin was missing, we applied only a minimum bound (MIN). All times are in millions of years (My).

| Bracket 1            | Bracket 2            | Type | Description                                                                                                                   | Min   | Max |
|----------------------|----------------------|------|-------------------------------------------------------------------------------------------------------------------------------|-------|-----|
| <i>Bolidomonas</i>   | <i>Triparma</i>      | PEND | FA(Parmales=66) - NA(Parmales=34); (Konno & Jordan, 2012)                                                                     | 66    | 155 |
| <i>Bolidomonas</i>   | <i>Campylodiscus</i> | GLIN | FA(diatoms=190) - FA(Parmales=66); (Rothpletz, 1896; Konno & Jordan, 2012)                                                    | 190   | 350 |
| <i>Corethron</i>     | <i>Campylodiscus</i> | PEND | FA(diatoms=190) - NA(diatoms=135); (Rothpletz, 1896; Harwood <i>et al.</i> , 2007)                                            | 190   | 302 |
| <i>Melosira</i>      | <i>Aulacoseira</i>   | GLIN | FA( <i>Melosira</i> =125) - FA( <i>Archeptyrgis</i> =115); (Geroch, 1978; Gersonde & Harwood, 1990)                           | 125   | 178 |
| <i>Stephanopyxis</i> | <i>Paralia</i>       | GLIN | FA( <i>Stephanopyxis</i> =100) - FA( <i>Hyalodiscus</i> =83.6); (Girard <i>et al.</i> , 2009; Witkowski <i>et al.</i> , 2011) | 100   | 166 |
| <i>Aulacodiscus</i>  | <i>Stellarima</i>    | GLIN | FA( <i>Aulacodiscus</i> =125) - FA( <i>Stellarima</i> =83.6); (Geroch, 1978; Witkowski <i>et al.</i> , 2011)                  | 125   | 224 |
| <i>Rhizosolenia</i>  | <i>Aulacodiscus</i>  | GLIN | FA( <i>Aulacodiscus</i> =125) - FA( <i>Rhizosolenia</i> =90); (Geroch, 1978; Damsté <i>et al.</i> , 2004)                     | 125   | 217 |
| <i>Actinocyclus</i>  | <i>Actinoptychus</i> | GLIN | FA( <i>Actinoptychus</i> =70.6) – FA( <i>Actinocyclus</i> =56.5); (Lazarus, 1994)                                             | 70    | 132 |
| <i>Stellarima</i>    | <i>Coscinodiscus</i> | GLIN | FA( <i>Stellarima</i> =83.6) – FA( <i>Coscinodiscus</i> =77.05); (Lazarus, 1994)                                              | 83    | 128 |
| <i>Trieres</i>       | <i>Odontella</i>     | GLIN | FA( <i>Triceratium</i> =77.05) – FA( <i>Trieres</i> =66); (Hajós & Stradner, 1975; Harwood, 1988)                             | 77    | 133 |
| <i>Amphitetras</i>   | <i>Amphipentas</i>   | MIN  | Neptune FA of <i>Amphitetras</i> ; (Lazarus, 1994)                                                                            | 9.16  |     |
| <i>Hemiaulus</i>     | <i>Chaetoceros</i>   | GLIN | FA( <i>Hemiaulus</i> ) - FA( <i>Chaetoceros</i> =55); (Fenner, 1994; Witkowski <i>et al.</i> , 2011)                          | 100   | 203 |
| <i>Eucampia</i>      | <i>Cerataulina</i>   | MIN  | Neptune FA of <i>Eucampia</i> ; (Lazarus, 1994)                                                                               | 20.05 |     |



|                       |                         |      |                                                                                                          |       |     |
|-----------------------|-------------------------|------|----------------------------------------------------------------------------------------------------------|-------|-----|
| <i>Cymatosira</i>     | <i>Campylosira</i>      | MIN  | Neptune FA of <i>Cymatosira</i> ; (Lazarus, 1994)                                                        | 44.18 |     |
| <i>Lithodesmium</i>   | <i>Bellerochea</i>      | MIN  | Neptune FA of <i>Lithodesmium</i> ; (Lazarus, 1994)                                                      | 29.96 |     |
| <i>Porosira</i>       | <i>Stephanodiscus</i>   | PEND | FA( <i>Praethalassiosirposis</i> =115) - NA( <i>Gladiopsis</i> =112); (Nikolaev <i>et al.</i> , 2001)    | 115   | 146 |
| <i>Porosira</i>       | <i>Lauderia</i>         | MIN  | Neptune FA of <i>Porosira</i> ; (Lazarus, 1994)                                                          | 9     |     |
| <i>Thalassiosira</i>  | <i>Shionodiscus</i>     | MIN  | Neptune FA of <i>Shionodiscus</i> ; (Lazarus, 1994)                                                      | 14.6  |     |
| <i>Stephanodiscus</i> | <i>Cyclostephanos</i>   | GLIN | FA( <i>Stephanodiscus</i> =16.36) – FA( <i>Cyclostephanos</i> =5); Neptune FA of Steph; (Alverson, 2014) | 16    | 73  |
| <i>Bacterosira</i>    | <i>Detonula</i>         | MIN  | Neptune FA of <i>Bacterosira</i> ; (Lazarus, 1994)                                                       | 8.35  |     |
| <i>Biddulphia</i>     | <i>Attheya</i>          | MIN  | Neptune FA of <i>Biddulphia</i> ; (Lazarus, 1994)                                                        | 70.6  |     |
| <i>Striatella</i>     | <i>Campylodiscus</i>    | MIN  | FA of <i>Surirella</i> and <i>Campylodiscus</i> ; (Hajós & Stradner, 1975; Sims <i>et al.</i> , 2006)    | 75    |     |
| <i>Thalassiothrix</i> | <i>Thalassionema</i>    | MIN  | Neptune FA of <i>Thalassiothrix</i> and <i>Thalassiosinema</i> ; (Lazarus, 1994)                         | 56.5  |     |
| <i>Synedra</i>        | <i>Fragilaria</i>       | GLIN | FA( <i>Synedra</i> =56.4) – FA( <i>Fragilaria</i> =37.7); (Lazarus, 1994)                                | 56    | 126 |
| <i>Synedropsis</i>    | <i>Grammonema</i>       | MIN  | FA of <i>Synedropsis</i> ; (Stickley <i>et al.</i> , 2009)                                               | 47    |     |
| <i>Tabularia</i>      | <i>Catacombas</i>       | MIN  | Neptune FA of <i>Tabularia</i> ; (Lazarus, 1994)                                                         | 9.18  |     |
| <i>Grammatophora</i>  | <i>Hyalosira</i>        | PEND | FA( <i>Grammatophora</i> =40) – NA( <i>Grammatophora</i> =34.18); (Edwards, 1991)                        | 40    | 82  |
| <i>Rhaphoneis</i>     | <i>Delphineis</i>       | GLIN | FA( <i>Rhaphoneis</i> =56.4) – FA( <i>Delphineis</i> =37.7); (Lazarus, 1994)                             | 38    | 53  |
| <i>Talaroneis</i>     | <i>Psammoneis</i>       | MIN  | Neptune FA of <i>Talaroneis</i> ; (Lazarus, 1994)                                                        | 20.73 |     |
| <i>Opephora</i>       | <i>Staurosirella</i>    | MIN  | Neptune FA of <i>Opephora</i> ; (Lazarus, 1994)                                                          | 20.05 |     |
| <i>Plagiogramma</i>   | <i>Dimeregramma</i>     | GLIN | FA( <i>Dimeregramma</i> =21.8) – FA( <i>Plagiogramma</i> =14.6); (Lazarus, 1994)                         | 21    | 68  |
| <i>Asteroplanus</i>   | <i>Asterionellopsis</i> | MIN  | FA of <i>Asterionellopsis</i> ; (Schrader & Gersonde, 1978)                                              | 5.3   |     |
| <i>Undatella</i>      | <i>Campylodiscus</i>    | MIN  | FA of raphid pennate diatom; (Singh <i>et al.</i> , 2006)                                                | 66    |     |
| <i>Bacillaria</i>     | <i>Denticula</i>        | MIN  | FA of several genera at 56.5 in Neptune dataset; (Lazarus, 1994)                                         | 56.47 |     |
| <i>Navicula</i>       | <i>Pleurosigma</i>      | GLIN | FA( <i>Navicula</i> =44.36) – FA( <i>Pleurosigma</i> =37.97); (Lazarus, 1994)                            | 44    | 88  |
| <i>Lyrella</i>        | <i>Cocconeis</i>        | GLIN | FA( <i>Cocconeis</i> =30.33) – FA( <i>Lyrella</i> =28.28); (Lazarus, 1994)                               | 30    | 57  |
| <i>Gomphonema</i>     | <i>Encyonema</i>        | GLIN | FA( <i>Encyonema</i> =14.18) – FA( <i>Gomphonema</i> =13.09); (Lazarus, 1994)                            | 14    | 34  |
| <i>Coronia</i>        | <i>Campylodiscus</i>    | MIN  | FA of <i>Campylodiscus</i> ; (Reinhold, 1937; Hajós & Stradner, 1975)                                    | 16    |     |

---

## References

**Alverson AJ. 2014.** Timing marine–freshwater transitions in the diatom order Thalassiosirales. *Paleobiology* **40**: 91–101.

**Damsté JSS, Muyzer G, Abbas B, Rampen SW, Massé G, Allard WG, Belt ST, Robert J-M, Rowland SJ, Moldowan JM, et al. 2004.** The rise of the rhizosolenid diatoms. *Science* **304**: 584–587.

**Edwards AR. 1991.** *The Oamaru Diatomite*. New Zealand Geological Survey paleontological bulletin, 64. DSIR Geology & Geophysics. Lower Hutt, New Zealand.

**Fenner J. 1994.** Diatoms of the Fur Formation, their taxonomy and biostratigraphic interpretation—results from the Harre borehole, Denmark. *Aarhus Geoscience* **1**: e131.

**Geroch S. 1978.** Lower Cretaceous diatoms in the Polish Carpathians. *Annales Societatis Geologorum Poloniae* **48**: 283–295.

**Gersonde R, Harwood DM. 1990.** 25. Lower Cretaceous diatoms from ODP LEG 113 Site 693 (Weddel sea). Part 1: Vegetative cells. In: Barker, P. F., Kenneth, J. P. et al. *Proceedings of the Ocean Drilling Program, Scientific Results* **113**: 365–402.

**Girard V, Saint Martin S, Saint Martin J-P, Schmidt AR, Struwe S, Perrichot V, Breton G, Néraudeau D. 2009.** Exceptional preservation of marine diatoms in upper Albian amber. *Geology* **37**: 83–86.

**Hajós M, Stradner H. 1975.** Late Cretaceous Archaeomonadaceae, Diatomaceae, and Silicoflagellatae from the South Pacific Ocean, Deep Sea Drilling Project, Leg 29, Site 275. *Initial Reports of the Deep Sea Drilling Project* **29**: 913–1009.

**Harwood DM. 1988.** Upper Cretaceous and lower Paleocene diatom and silicoflagellate biostratigraphy of Seymour Island, eastern Antarctic Peninsula. *Geological Society of America*

*Memoirs* **169**: 55–130.

**Harwood DM, Nikolaev VA, Winter DM. 2007.** Cretaceous Records of Diatom Evolution, Radiation, and Expansion. *The Paleontological Society Papers* **13**: 33–59.

**Konno S, Jordan RW. 2012.** Parmales. In: John Wiley & Sons, Ltd, ed. eLS. Chichester, UK: John Wiley & Sons, Ltd.

**Lazarus D. 1994.** Neptune: A marine micropaleontology database. *Mathematical geology* **26**: 817–832.

**Nikolaev VA, Kociolek JP, Fourtanier E, Barron JA, Harwood DM. 2001.** Late Cretaceous diatoms (Bacillariophyceae) from the Marca shale member of the Moreno formation, California. *Occasional papers of the California Academy of Sciences* **152**: 1–119.

**Norris RW, Strope CL, McCandlish DM, Stoltzfus A. 2015.** Bayesian priors for tree calibration: Evaluating two new approaches based on fossil intervals. *bioRxiv*: 014340.

**Reinhold T. 1937.** Fossil diatoms of the Neogene of Java and their zonal distribution. *Verhandel. Geol. -Mijnbouw. Geol. Ser.* **12**: 43–133.

**Rothpletz A. 1896.** Ueber die Flysch-Fucoiden und einige andere fossile Algen, sowie über liasische, Diatomeen führende Hornschwämme. *Zeitschrift der Deutschen Geologischen Gesellschaft* **48**: 854–914.

**Schrader H, Gersonde R. 1978.** The late Messinian Mediterranean brackish to freshwater environment diatom floral evidence. In Zachariasse et al. *Microplaeontological counting methods and In Hsü, K., Montadert, L., et al. Init. Repts DSDPPt. 1*): Washington (US Govt. Printing Office) **42**: 761–775.

**Sims PA, Mann DG, Medlin LK. 2006.** Evolution of the diatoms: Insights from fossil, biological and molecular data. *Phycologia* **45**: 361–402.



**Singh RS, Stoermer EF, Kar R. 2006.** Earliest freshwater diatoms from the Deccan Intertrappean (Maastrichtian) sediments of India. *Micropaleontology* **52**: 545–551.

**Stickley CE, St John K, Koç N, Jordan RW, Passchier S, Pearce RB, Kearns LE. 2009.** Evidence for middle Eocene Arctic sea ice from diatoms and ice-rafted debris. *Nature* **460**: 376–379.

**Witkowski J, Harwood DM, Chin K. 2011.** Taxonomic composition, paleoecology and biostratigraphy of late Cretaceous diatoms from Devon Island, Nunavut, Canadian High Arctic. *Cretaceous Research* **32**: 277–300.
